# Supplementary figures and images for: Multiplex Tissue Imaging Harmonization: A Multicenter Experience from CIMAC-CIDC Immuno-Oncology Biomarkers Network
Source: PubMed Central journal article supplement — Clin Cancer Res. 2021 Jul 12;27(18):5072–83. doi: 10.1158/1078-0432.CCR-21-2051 (PMC9777693; doi:10.1158/1078-0432.ccr-21-2051), 2021-07-12

A

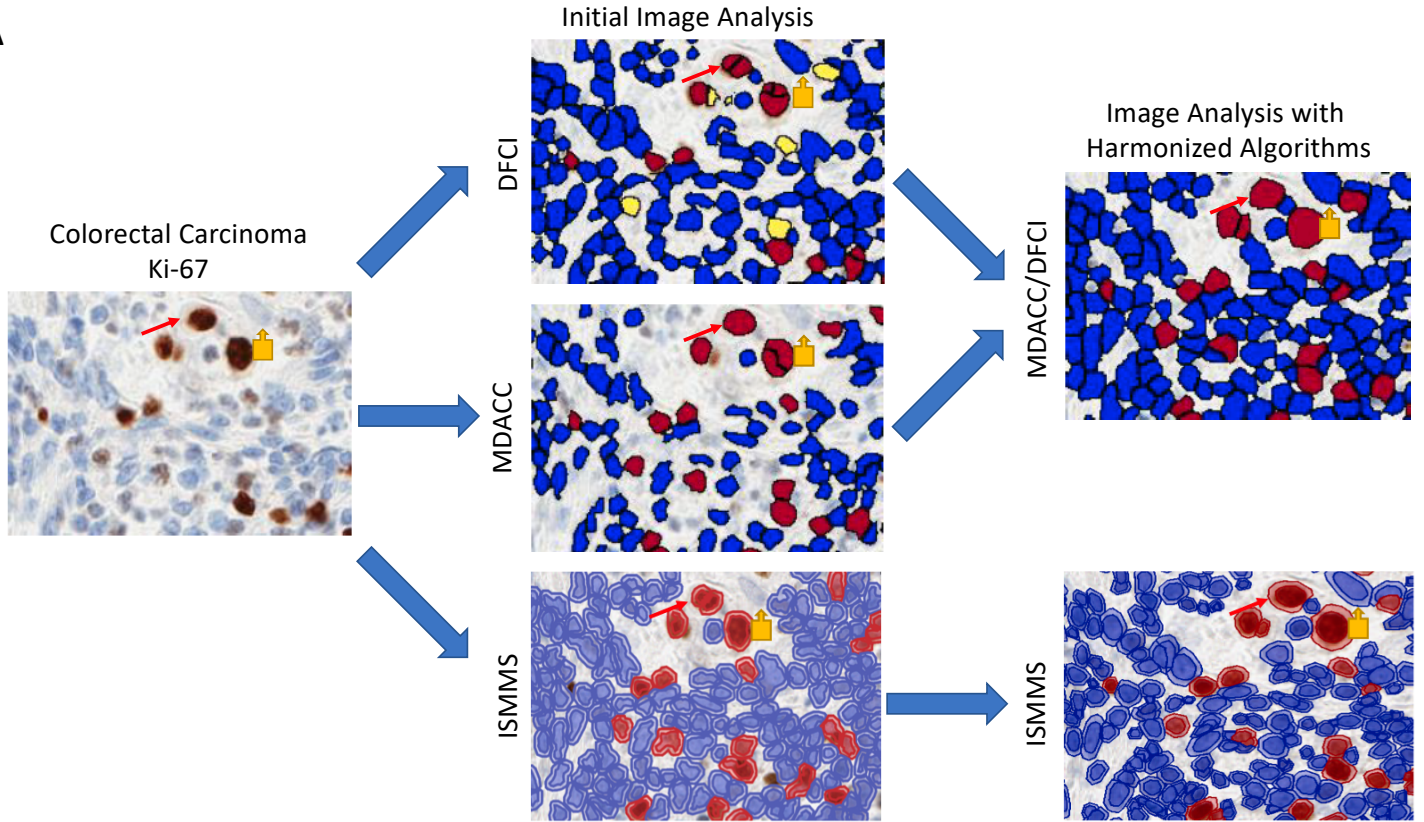

B

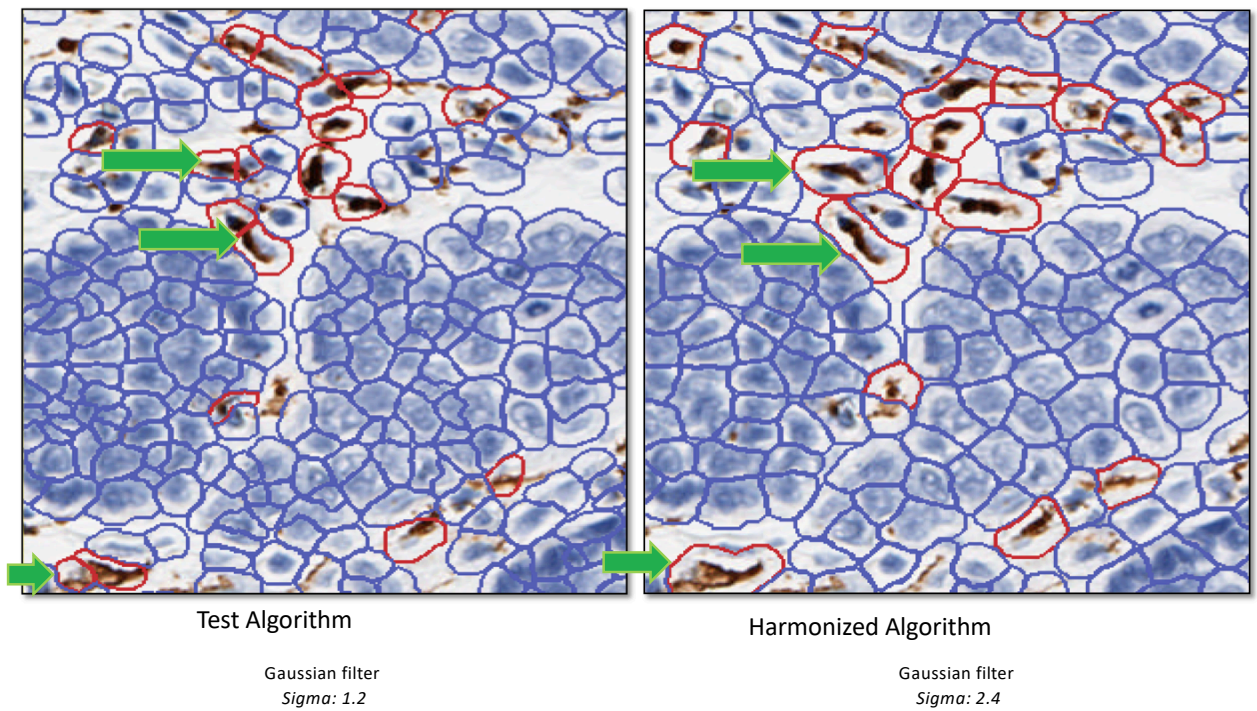

Supplement: 10780432ccr212051-sup-267018_1_supp_7208571_qv63lc.pdf [file 10780432ccr212051-sup-267018_1_supp_7208571_qv63lc.pdf]

**A**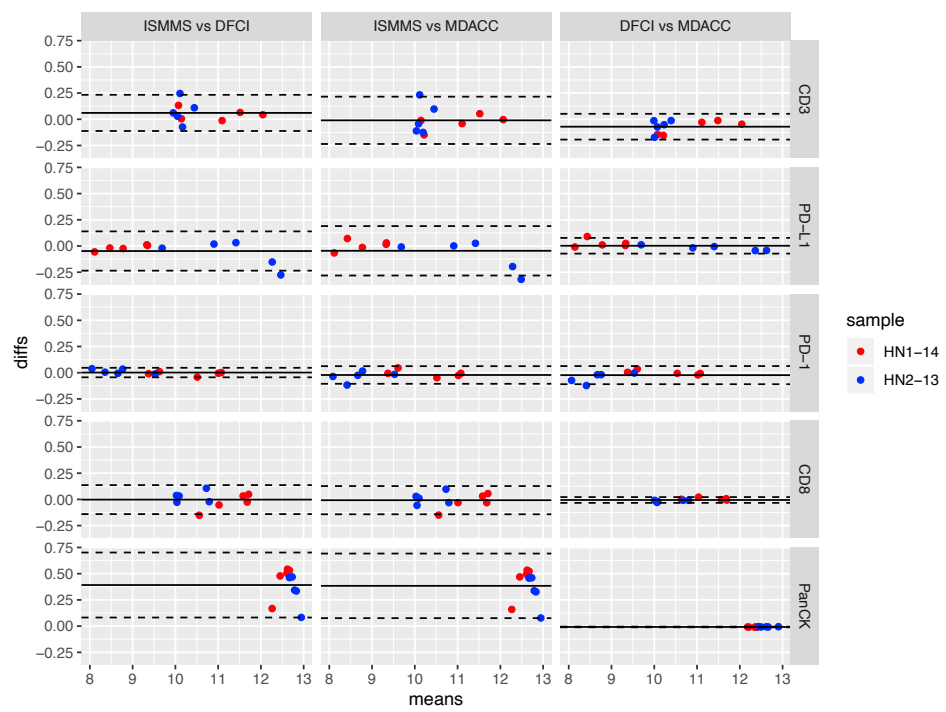**B**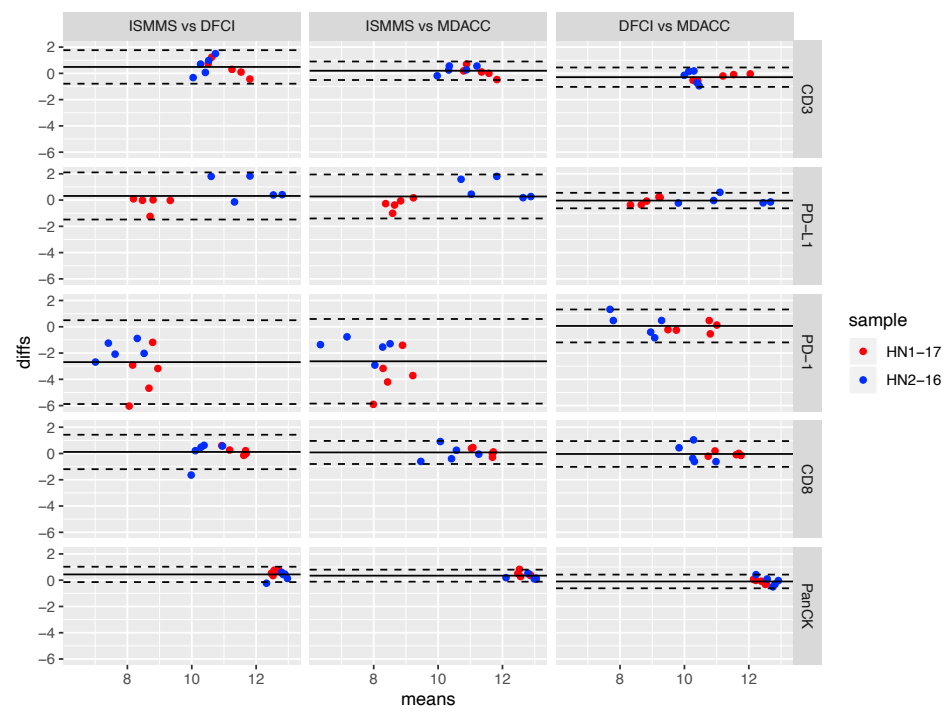

Supplement: 10780432ccr212051-sup-267018_1_supp_7208616_qv63lc.pdf [file 10780432ccr212051-sup-267018_1_supp_7208616_qv63lc.pdf]
